# Supplementary material for: Logics and properties of a genetic regulatory program that drives embryonic muscle development in an echinoderm
Source: eLife. 2015 Jul 28;4:e07343. doi: 10.7554/eLife.07343 (PMC4549668; doi:10.7554/eLife.07343)
Supplement: Figure 6—source data 1. — DOI: http://dx.doi.org/10.7554/eLife.07343.020 [file elife07343s001.xlsx]

## Sheet:  DATA 44h
Perturbation data derived from NanoString and qPCR analysis showing fold differences of gene expression in MO-injected embryos after normalization against controls.
NanoSring data at 44h
	FOXY MO		FOXC MO			FOXF MO			FOXL1 MO			SIX1/2 MO
	Biol replica 1	Biol replica 2	Biol replica 1	Biol replica 2	Biol replica 3	Biol replica 1	Biol replica 2	Biol replica 3	Biol replica 1	Biol replica 2	Biol replica 3	Biol replica 1	Biol replica 2
Dach1	1.46816	0.774326	2.12675	0.863663	2.38408		1.49422	2.2791	2.30175	1.00955	0.695811	1.10754	2.74932
Delta	0.598531	0.775757	0.405921	0.786015	0.712763	1.67139	0.9647	1.12611	0.686501	1.67397	0.81386	0.845806	0.502488
Erg	1.02957	0.785756	1.78535	1.19397	1.41571	0.875671	1.18223	1.27658	1.56806	0.886215	0.799166	1.1651	1.6674
Ese	0.744065	0.96262	0.726543	0.797136	1.01249	1.1279	1.58382	1.29196	0.707505	1.25119	0.823926	1.17832	1.30933
Ets1/2	1.31397	0.722857	1.44703	0.975317	1.02323	0.819985	0.918291	0.846617	1.17962	0.756545	0.731256	1.23863	2.09283
Eya	0.490906	0.677865	1.07418	0.891228	1.23529	0.741838	0.885329	1.10365	0.953412	0.871789	0.616117	0.998836	1.08076
FGFR	0.685008	0.62028	0.822489	0.700991	1.33364	1.01932	0.945861	1.10806	1.06245	0.587784	0.624317	0.937401	1.03456
FOXC	0.163762	0.347496	3.29593	4.44686	2.6693	1.37456	1.02431	1.05031	1.01187	1.00029	0.652855	1.19651	0.786628
FOXF	0.0670975	0.116448	0.254224	0.74037	0.532486	2.39572	0.859206	0.891104	0.325434	0.850701	1.07075	1.15174	0.193803
FOXL1	0.25547	0.190921	0.281843	0.395825	0.31501	1.37475	0.668577	0.373583	0.542673	1.53781	0.998464	0.368451	0.107429
FOXY	0.352262	0.187498	5.32202	1.96101	1.92623		2.30185	1.71766	4.03834	1.37431	0.685521	1.51658	3.28556
GATAC	0.649479	0.659699	0.921608	1.14415	1.42454	1.27044	0.770338	1.09979	0.852185	0.884239	0.862699	1.20063	1.15053
GATAE	0.50566	0.476973	1.01013	0.986645	0.712436	0.961157	0.988797	0.740157	1.0838	0.922229	0.601996	1.05018	0.98862
Gcm	0.790819	0.576695	1.7134	1.02793	1.36544	0.762007	1.16841	0.994152	1.18242	0.95104	0.652991	0.90032	1.36024
Gli1	0.727076	0.527597	0.966903	0.894536	0.948086	0.953416	0.820345	1.12567	1.00147	1.00265	0.778093	0.820663	0.945482
Hh	0.531269	0.72395	0.553214	0.560345	0.557701	0.946947	0.951451	0.772626	0.831271	0.645499	0.802448	0.736983	0.619852
Mef2	0.629527	0.6872	0.620249	0.758162	0.735199	1.08825	0.796936	0.927847	0.666773	0.871194	0.880567	0.874761	0.750332
Nanos2	0.400199	0.303782	1.45416	1.13711	1.3335	0.683218	1.10391	0.91302	1.08044	1.17539	0.825465	1.29085	1.36437
Not	1.46222	0.953132	2.38227	1.31841	2.42491		1.81873	2.10039	2.20282	1.98206	1.11865	1.90498	2.9564
Notch	0.705611	0.66019	0.770561	0.769377	0.997069	1.01805	1.11767	1.08074	1.01975	0.941829	0.785895	1.08963	1.11164
Pax6	0.776837	0.572944	1.0723	0.843387	1.12354	0.856657	1.27923	1.16032	1.0982	0.894623	0.819007	0.935648	1.4969
Pitx2	0.0758664	0.101353	0.103481	1.17672	1.27109		0.160327	0.713655	0.0752655	0.778396		0.317846	0.106826
Prox1	0.754178	0.761358	1.12679	0.915199	1.57018	0.971518	0.872732	1.148	1.18787	0.847054	0.850604	1.26834	1.56218
Ptch1	0.596978	0.599991	0.638914	0.658776	0.7055	1.15876	0.806184	0.952178	0.758356	0.833403	0.933603	1.00497	0.688981
ScratchX	0.0731156	0.0687858	0.412731	0.623363	0.697116	1.65275	0.685567	0.974139	0.449922	1.02821	1.00643	0.664013	0.383665
Scl	0.970677	1.02353	1.19231	1.0453	1.16733	0.969751	1.2278	0.856386	1.22186	1.19296	1.1955	1.50032	1.62794
SFRP	0.465679	0.532212	0.687019	0.613608	1.00387	0.764709	0.76129	1.16832		0.555476	0.31739	0.816756	0.578226
Similar to myocardin	0.759941	0.512503	0.969441	0.804898	1.03693	0.967534	0.843121	1.05149	1.14309	1.08772	0.984111	0.775867	0.84829
Six1/2	0.455868	0.447796	0.959571	1.14845	1.08508	1.10444	0.990087	0.743245	0.86543	0.959964	1.00045	0.894191	0.777229
Smo	0.722528	0.549893	0.974193	0.72175	0.905578	0.838025	1.13368	1.11008	1.03692	0.675081	0.703843	0.834864	1.14603
SoxC	0.765247	0.714074	1.21467	1.0221	1.06195	0.937753	1.0842	1.0731	1.16402	1.06298	0.754459	1.05079	1.10472
SoxE	0.276178	0.578366	0.551605		0.442203	1.04724	0.972086	0.469464	0.371844	1.08138	0.985344	1.4921	0.44871
Tbx6	0.552795		0.362505	0.24315	0.444883	0.571461	0.725519	0.499558	0.548416	0.512602	0.489068		0.552696
Tcf21L (MyoR2)	0.188315	0.260622	0.176074	0.655603	0.911872		0.553763	0.651598		0.239214	0.947861	0.37408	0.0296087
Tead4	0.673174	0.639489	0.7303	0.729032	1.09189	0.948384	0.779234	1.22318	0.880895	0.918412	0.726968	0.860323	0.801353
VEGFR	1.31758	0.975717	1.89505	1.52293	1.5927	0.881592	1.23304	1.41546	1.35864	0.830331	0.792344	1.27227	1.85791

## Sheet:  DATA 48h
Perturbation data derived from NanoString and qPCR analysis showing fold differences of gene expression in MO-injected embryos after normalization against controls.
NanoSring data at 48h
	MYOD2 MO			FOXF MO			FOXC MO			FOXY MO			FOXL1 MO			SIX1/2 MO		TBX6 MO
	Biol replica 1	Biol replica 2	Biol replica 3	Biol replica 1	Biol replica 2	Biol replica 3	Biol replica 1	Biol replica 2	Biol replica 3	Biol replica 1	Biol replica 2	Biol replica 3	Biol replica 1	Biol replica 2	Biol replica 3	Biol replica 1	Biol replica 2	Biol replica 1	Biol replica 2	Biol replica 3
Dach1	1.06185	1.92656	1.04951	1.13016	0.890987	2.18028	1.34796	1.3207	1.03105	1.02533	1.79884	1.37416	1.20836	2.74611	2.71201	1.37896	2.63841	2.29253	1.73188	3.35752
Delta	1.02628	0.566535	1.12411	0.844224	1.29953	0.961478	0.485387	0.560239	0.62586	0.626465	0.751735	0.807037	1.28936	0.828566	0.896793	0.581744	0.685736	0.740346	1.08244	0.887911
Erg	0.654238	1.12824	0.968687	0.917378	0.804895	1.59678	1.05362	0.838946	0.787639	0.69615	1.1643	1.09947	0.715291	1.48873	1.10052	0.971037	1.54948	1.16289	1.29803	1.92674
Ese	0.966079	0.909028	0.739394	0.794076	0.926373	1.56567	0.567408	0.601342	0.596245	0.578272	0.940947	0.623326	0.748214	0.934789	1.12894	0.70797	1.33922	0.842805	0.876243	1.43321
Ets1/2	1.13713	0.890824	0.749653	0.68217	0.739587	1.42907	0.769218	0.796365	0.724746	0.471315	1.20729	0.791843	0.474721	1.60589	1.11785	0.776609	1.87681	0.917943	1.29469	2.54825
Eya	1.17836	1.22648	1.11743	1.1303	0.806501	1.0678	0.957242	1.0496	0.736825	0.718669	0.666663	0.731901	0.873429	0.95049	1.16259	1.21159	1.42053	0.836755	1.21573	1.58607
FGFR	1.55896	1.10385	1.08795	1.68364	1.03169	0.957568	0.984216	0.680476	0.555752	0.856796	0.956124	0.789905	0.658506	1.19676	1.46085	1.03188	1.09653	1.17567	1.16832	1.55438
FOXC	1.35354	1.03408	1.12737	0.865942	0.831983	1.05332	2.89752	4.86785	6.36846	0.244951	0.153624	0.591305	0.8467	1.30809	0.578504	0.937331	1.12877	1.00225	1.56808	1.39652
FOXF	3.56111	0.936245	0.995261	1.7913	2.12168		0.873079	1.18373	1.09517	0.107085	0.0813164	0.0458027	0.589423	0.472333	0.254551	1.04639	0.554805	1.04456	0.947761	0.739208
FOXL1		0.364009	1.13515	0.674688	1.08276	0.783917	0.431667	0.602775	0.7379	0.48332	0.319739	0.571706		1.22971	0.213607	0.467027	0.268494	0.777011	1.31231	0.357096
FOXY	0.705295	2.56059	0.622884	1.54206		7.75855	2.27044	1.69929	1.91655	0.125667	0.419531	1.8577	1.09336	4.85898	2.86784	1.46273	4.66786	3.61389	2.76091	5.80779
GATAC	0.952148	0.991614	0.833592	1.02097	1.14525	0.918837	0.953423	0.972407	0.838549	0.587609	0.591453	0.944154	0.686956	1.07892	1.25191	0.709117	1.11466	0.916021	1.40693	1.59902
GATAE	0.924677	1.02547	1.06946	0.99365	0.85924	1.55709	0.917414	0.996777	0.973588	0.554892	0.810662	0.759896	0.829054	1.34308	0.844663	0.994866	1.51038	1.26785	1.24388	1.67126
Gcm	0.842116	0.849099	0.849639	0.873531	0.833536	1.54802	1.07633	1.26575	1.1612	0.716858	1.33383	0.938449	1.00958	1.41229	1.01891	1.10862	1.68513	1.03665	1.31311	1.92146
Gli1	1.17773	0.817271	0.961995	0.842453	0.971733	0.891596	0.761916	0.874757	0.846418	0.643888	0.868672	0.947664	1.00083	0.976217	0.756055	0.85568	0.978609	1.20844	1.42831	1.25289
Hh	0.651706	0.703687	0.854706	1.16511	0.851309	0.795061	0.652328	0.720765	0.675079	0.843313	1.14711	0.809563	0.781201	1.25706	0.624059	0.808917	1.16523	1.00238	0.811963	1.61463
Mef2	1.01375	0.557354	1.38685	0.596718	1.37881	1.0202	0.433659	0.823406	0.85593	0.725839	0.790396	0.555365	0.857883	0.719664	0.551517	0.821562	0.916709	0.972488	0.969142	0.97322
Myod2		1.7569	0.859876	0.540234	0.498596			0.526848		0.0873782		0.641238	0.494695		0.716513	0.869934			0.594119
Nanos2	0.860927	0.923724	0.609774	0.851297	0.469591	1.98751	1.16958	1.03132	1.43973	0.247854	0.350353	0.818296	0.663247	1.41837	1.3261	0.771133	2.13296	1.09383	1.68482	1.65614
Not	1.61072	2.05027		1.66774	1.03065	2.55508	2.57946	1.30121	1.25265	1.00397	1.85249	1.96464	0.929628	3.8585	4.50893	1.29225	5.07727	1.54473	1.44105	3.58186
Notch	0.997893	0.874828	1.17554	1.01042	1.15084	1.51149	0.77164	0.879203	0.876151	0.853721	0.822698	0.805646	0.919839	1.12738	1.16246	1.05422	1.32182	1.01776	1.15785	1.42103
Pax6	0.879693	1.07466	1.07014	1.03128	1.0976	1.66568	0.939837	1.01086	0.997779	0.763944	0.923958	0.855441	0.956595	1.40573	1.16383	1.04385	1.6108	1.30312	1.08917	1.64896
Pitx2	3.35566		1.51062	0.942842	2.50534	0.0573884	0.655971	0.660167	0.577774	0.153505	0.211423	0.0540803	0.710211	0.117368	0.416831	0.197199	0.179245	0.464261	0.415168	0.0971531
Prox1	0.540439	1.15127	1.1481	0.976978	1.05569	1.07596	0.922555	0.835893	0.81387	0.818133	1.00148	0.75242	0.804224	1.43734	1.1031	1.13399	1.63746	1.11473	1.10519	2.0809
Ptch1	1.159	0.817211	1.06714	0.956089	1.12883	0.831165	0.662433	0.885126	0.914816	0.838616	0.82205	0.813784	0.803027	0.809933	0.851653	0.950666	0.819908	0.980115	1.16537	1.08438
ScratchX	2.14502		1.25178	1.10785	1.18909	0.410226	0.717596	0.574873	0.499576	0.0509755	0.091937	0.0836397	0.73486	0.424213	0.361315	0.5686	0.523871	0.543637	1.08168	0.583323
Scl	1.07381	1.12135	1.32994	1.18362	0.997191	1.69111	1.05575	0.936619	1.24242	0.717666	1.80456	0.961857	1.00258	1.93756	1.41592	1.03619	2.1783	2.43749	1.73101	3.56209
SFRP	0.82413	1.24062	0.890786	0.939768	0.642713	1.50781	0.794147	0.669239	0.507898	0.537531	0.508303	0.678716	0.617302	0.755943	1.04678	0.775388	0.53674	0.903676	1.36161	0.960512
Similar to myocardin	1.23457	0.807276	1.08417	0.936338	1.10627	0.759801	0.820714	0.90752	0.834074	0.722553	0.606034	0.961857	1.29741	0.989529	0.814097	0.866368	0.996045	0.913946	1.46261	1.1329
Six1/2	2.23711	0.839838	0.982715	0.986966	1.01395	1.02381	1.06337	1.25735	0.811715	0.531612	0.829812	0.431699	0.881305	0.922013	0.881862	0.828509	1.03434	0.677604	1.01983	1.03722
Smo	1.08407	1.11685	0.979805	1.1749	1.0595	1.48057	1.0027	0.923583	0.996597	0.723244	0.778797	0.860862	0.785183	0.994573	1.10171	0.964476	1.38274	1.23572	1.14368	1.33201
SoxC	0.856827	0.748006	0.886517	0.87593	0.969487	1.47928	0.847952	0.926946	0.833712	0.688553	0.887614	0.963343	0.919305	1.17747	0.985948	0.90431	1.15362	0.96367	1.35077	1.34366
SoxE	1.50067	0.934394	1.18349	1.22041	1.1902	0.467066	0.830536	1.18588	1.09329	0.875661	0.414017	0.341459	0.765979	0.596244	0.582706	1.24722	0.829647	0.849215	0.873355	0.909135
Tbx6	0.902362	0.338831	1.32607	0.729316	1.44172	0.914115	1.24414	0.304683	0.230078		0.705711		0.810584	0.414058	0.967292	0.614893		0.330683	0.705516	0.54988
Tcf21L (MyoR2)	2.55669		1.2023	0.615867		0.173881	0.486596	0.571918	0.548519	0.281466	0.241711	0.266174	0.394005	0.218045	0.429908	0.461912	0.095143	0.435221	0.822052	0.235423
Tead4	1.05354	0.936019	1.0525	0.837873	0.972265	0.973141	0.718503	0.753351	0.726422	0.679549	0.804605	0.912349	0.936935	1.02452	1.01361	0.84505	0.954624	1.01644	1.30182	1.11604
Twist		1.45734	1.45918	1.72526	0.846102		1.56967	0.340589		0.0847304		0	0.719556		2.49624	0.984168			0.990198
VEGFR	1.03686	1.18271	0.993973	1.03628	0.894745	1.87688	1.18513	1.21698	0.932841	0.794089	1.55384	0.958254	0.661055	1.82497	1.33977	0.994456	2.30217	1.18505	1.23274	2.35003

## Sheet:  qPCR DATA
Perturbation data derived from NanoString and qPCR analysis showing fold differences of gene expression in MO-injected embryos after normalization against controls.
qPCR fold difference (MO injected versus control)
	FoxY MO		FoxC MO			FoxF MO
	44h		44h		48h	48h
	Biol replica 1	Biol replica 2	Biol replica 1	Biol replica 2	Biol replica 1	Biol replica 1	Biol replica 2
FOXY	0.1377	0.1063				2.25	2.21
FOXC	0.3267	0.1545				0.3773	0.8333
FOXF	0.0417		0.0648	0.1351	0.0879	1.01	0.8474
Nanos2	0.2074
