# Supplementary material for: Logics and properties of a genetic regulatory program that drives embryonic muscle development in an echinoderm
Source: eLife. 2015 Jul 28;4:e07343. doi: 10.7554/eLife.07343 (PMC4549668; doi:10.7554/eLife.07343)
Supplement: Figure 6—source data 2. — DOI: http://dx.doi.org/10.7554/eLife.07343.021 [file elife07343s002.xlsx]

## Sheet: lane 1-12
Raw data derived from NanoString analysis
Lane 1-12
Detected mRNAs
File Attributes
File name			x	x	x	x	x	x	x	x	x	x	x	x
Sample ID			x	x	x	x	x	x	x	x	x	x	x	x
Owner
Sample Date			x	x	x	x	x	x	x	x	x	x	x	x
File Version			x	x	x	x	x	x	x	x	x	x	x	x
GeneRLF			x	x	x	x	x	x	x	x	x	x	x	x
Comments
Lane Attributes
Lane ID			1	2	3	4	5	6	7	8	9	10	11	12
FOV Count			x	x	x	x	x	x	x	x	x	x	x	x
FOV Counted			x	x	x	x	x	x	x	x	x	x	x	x
Scanner ID			x	x	x	x	x	x	x	x	x	x	x	x
StagePosition			x	x	x	x	x	x	x	x	x	x	x	x
Binding Density			x	x	x	x	x	x	x	x	x	x	x	x
Messages
Reporter Counts
Code Class	Name	Accession
Positive	x	x	x	x	x	x	x	x	x	x	x	x	x	x
Positive	x	x	x	x	x	x	x	x	x	x	x	x	x	x
Positive	x	x	x	x	x	x	x	x	x	x	x	x	x	x
Positive	x	x	x	x	x	x	x	x	x	x	x	x	x	x
Positive	x	x	x	x	x	x	x	x	x	x	x	x	x	x
Positive	x	x	x	x	x	x	x	x	x	x	x	x	x	x
	Sum		x	x	x	x	x	x	x	x	x	x	x	x
	Average
	Lane normalisation factor		1.00762	0.905219	0.857988	0.820416	0.729097	1.22926	1.16962	1.21817	0.98807	1.00873	1.10014	1.34207
Negative	NEG_A(0)	ERCC_00096.1	4.03049	7.24175	11.1538	6.56333	6.56187	13.5219	7.01773	17.0544	7.90456	10.0873	13.2017	10.7366
Negative	NEG_B(0)	ERCC_00041.1	9.06861	4.52609	2.57396	4.10208	5.10368	7.37559	4.67849	10.9635	4.94035	8.06984	3.30042	10.7366
Negative	NEG_C(0)	ERCC_00019.1	6.04574	12.6731	9.43786	6.56333	8.02006	9.83412	8.18735	3.6545	8.89263	9.07857	11.0014	12.0787
Negative	NEG_D(0)	ERCC_00076.1	16.122	36.2087	12.8698	13.9471	27.7057	24.5853	5.84811	36.545	24.7017	22.1921	13.2017	40.2622
Negative	NEG_E(0)	ERCC_00098.1	10.0762	10.8626	11.1538	6.56333	9.47826	6.14632	12.8658	12.1817	9.8807	9.07857	14.3018	21.4732
Negative	NEG_F(0)	ERCC_00126.1	12.0915	9.05219	9.43786	8.20416	8.74916	13.5219	17.5443	18.2725	11.8568	16.1397	16.5021	17.447
Negative	NEG_G(0)	ERCC_00144.1	0	0	0.857988	0	1.45819	1.22926	1.16962	2.43634	4.94035	0	0	4.02622
Negative	NEG_H(0)	ERCC_00154.1	2.01525	3.62087	0.857988	0.820416	1.45819	0	2.33924	2.43634	1.97614	2.01746	1.10014	5.36829
		Mean	7.43122	10.5232	7.29289	5.84546	8.56689	9.5268	7.45634	12.943	9.38666	9.58293	9.07615	15.2661
		Std Dev	5.41116	11.1596	5.00288	4.39489	8.31983	7.87799	5.44803	11.4263	6.94667	7.11239	6.54164	11.6102
	Mean + 2 Std Dev		18.2535	32.8424	17.2987	14.6352	25.2065	25.2828	18.3524	35.7956	23.28	23.8077	22.1594	38.4866
			6 48 contr	2 44 contr	1 48 tbx	2 48 tbxr	7 48 tbx	5 48 myod	6 48 myod	2 44 foxl	2 48 foxl	5 48 foxl	2 44 six	5 48 six
Endogenous	Dach1	dach_742644.1	3448.76	2931.64	2740.84	3811.09	5765.88	1778.81	393.154	5564.4	4068.6	2794.4	3940.02	3173.22
Endogenous	Delta	NM_001032370.1	164.558	533.777	272.445	192.571	356.964	181.302	18.1309	302.17	234.555	283.737	131.114	127.388
Endogenous	Erg	NM_214668.1	1032.54	1082.04	750.761	899.337	991.231	663.632	72.5235	1399.11	907.006	668.616	881.953	903.205
Endogenous	Ese	ese_742603.1	303.62	537.915	270.397	348.846	390.24	127.709	31.4905	313.829	296.984	176.328	344.292	166.023
Endogenous	Ets1/2	NM_214533.1	398.647	551.363	460.904	647.281	584.856	316.993	48.6671	536.327	532.431	273.891	564.073	445.859
Endogenous	Eya	GLEAN3_13869.1	414.87	742.736	407.644	461.767	520.32	270.242	52.4841	583.936	361.197	288.212	392.398	397.828
Endogenous	FGFR	GLEAN3_20677.1	142.539	246.2	180.265	170.39	350.914	109.465	23.8564	215.697	171.234	90.4019	124.511	140.963
Endogenous	FOXC	DQ286740.1	216.706	667.221	329.802	282.303	448.726	313.572	31.4905	556.731	345.144	321.329	256.568	353.973
Endogenous	FOXF	DQ286741.1	32.448	159.306	68.6234	35.2879	110.921	38.7689	12.4053	42.7507	29.4309	31.3274	15.0922	55.3409
Endogenous	FOXL1	GLEAN3_15719.1	62.5782	395.161	281.663	86.7074	362.006	228.052	19.0851	176.833	389.736	797.506	20.7518	127.388
Endogenous	FOXY	AF517552.1	604.923	364.127	242.743	537.384	774.43	156.216	45.8043	1212.57	586.834	374.139	584.825	498.068
Endogenous	GATAC	NM_214539.1	168.034	283.44	197.676	230.884	294.445	126.569	17.1766	199.18	203.341	142.316	159.412	146.183
Endogenous	GATAE	NM_001005725.1	749.78	1258.93	709.792	640.223	1112.24	538.203	74.432	1125.12	671.559	569.263	608.406	679.753
Endogenous	Gcm	NM_214661.1	781.069	1791.67	1023.21	1084.85	1141.48	662.492	70.615	1746.95	1040.78	1074.08	1191.34	1173.64
Endogenous	Gli1	GLEAN3_17627.1	1796.23	2561.3	2169.32	1528.47	3520.23	1255.43	227.113	2115.19	1554.49	1782.08	1183.8	1516.13
Endogenous	Hh	NM_001012702.1	177.305	333.093	167.974	169.382	293.437	141.392	12.4053	228.328	172.126	176.328	100.929	181.685
Endogenous	mef2	XM_790894.2	464.701	920.662	620.684	387.159	937.787	515.398	50.5756	506.208	373.683	435.003	337.689	414.534
Endogenous	Myod	GLEAN3_21119.1	221.342	188.27	62.478	95.7814	214.783	71.8365	26.7192	373.097	125.75	100.248	146.206	106.505
Endogenous	Myod2	GLEAN3_06232.1	1.15886	0	3.07269	1.00823	0	2.28052	0	0	0	1.79014	1.88653	3.1325
Endogenous	nanos2	GLEAN3_03591.1	113.568	181.029	97.3019	91.7485	110.921	72.9767	10.4968	161.287	102.562	108.303	120.738	125.3
Endogenous	Not	NM_214562.1	115.886	109.652	58.3811	135.102	171.423	51.3118	20.0394	199.18	189.963	62.6548	158.469	86.6659
Endogenous	Notch	GLEAN3_14131.1	1362.81	1886.84	1444.16	1092.92	1979.44	823.269	146.001	1586.64	1131.75	878.957	1025.33	1002.4
Endogenous	Pax6	AF016886.1	2121.87	2424.75	1756.55	1399.42	2706.47	1134.56	200.394	2195.83	1557.16	1383.78	1774.28	1502.56
Endogenous	pitx2	XM_777251.1	37.0834	234.821	89.108	23.1892	234.951	212.089	13.3596	14.5741	36.5656	136.05	12.2625	37.59
Endogenous	Prox1	XM_776485.1	427.618	458.262	354.384	419.422	500.153	272.522	24.8107	448.883	378.142	260.465	349.951	365.459
Endogenous	Ptch1	XM_787086.2	1204.05	2383.38	1566.05	1234.07	2660.09	1155.08	149.818	1490.45	1203.1	1185.97	802.719	1397.1
Endogenous	ScratchX	GLEAN3_15640.1	136.745	1202.03	686.234	344.813	726.029	614.601	31.4905	445.968	327.307	492.288	225.44	379.033
Endogenous	Scl	XM_787384.1	115.886	113.79	120.859	153.25	186.549	66.1352	13.3596	114.65	108.805	68.0252	90.5535	69.9592
Endogenous	SFRP	NM_214507.1	2038.43	2953.36	1375.54	1224.99	2563.28	1404.8	180.354	2009.28	1258.39	1328.28	834.79	1660.23
Endogenous	similar to myocardin	XM_777934.2	676.772	868.939	693.404	551.499	1131.39	555.307	89.7001	819.065	628.751	906.704	360.327	602.484
Endogenous	Six1/2	six12_742614.1	55.6251	211.028	111.641	77.6334	108.904	77.5378	13.3596	150.599	90.0763	94.8772	80.1776	88.7542
Endogenous	Smo	XM_793986.1	762.527	1107.9	788.657	624.092	1248.37	548.466	88.7458	947.317	608.238	599.696	620.669	733.005
Endogenous	SoxC	XM_792991.2	1504.2	2450.62	1506.64	1369.17	2451.35	1010.27	138.367	2352.26	1566.08	1429.42	1323.4	1399.18
Endogenous	SoxE	GLEAN3_16881.1	106.615	301.025	150.562	93.765	200.666	72.9767	17.1766	92.3027	80.266	64.4449	66.0286	104.417
Endogenous	Tbx6	XM_791917.2	19.7006	27.9302	19.4604	9.07403	16.134	18.2442	1.90851	12.6309	8.91845	15.2162	7.54612	11.4858
Endogenous	tcf21L (myor2)	GLEAN3_12008.1	6.95314	195.511	112.665	30.2468	64.5359	90.0806	1.90851	34.0063	36.5656	40.2781	2.8298	46.9875
Endogenous	Tead4	GLEAN3_21210.1	1113.66	2013.04	1373.49	1012.26	2561.27	1095.79	125.962	1462.27	1212.91	1330.97	788.57	1194.53
Endogenous	Twist	NM_001105709.1	3.47657	4.13781	5.12115	0	11.0921	7.98183	0.954256	0.971608	4.45922	5.37041	2.8298	7.30917
Endogenous	ubq	GLEAN3_21496.1	62477.4	91629.7	58622.8	43732.8	108708	51315.2	6707.47	75559	57082.5	70015.8	44791.9	69671
Endogenous	VEGFR	XM_779931.2	668.66	777.908	567.424	663.412	784.514	445.842	74.432	871.532	672.451	404.571	706.506	605.617

## Sheet: lane 13-24
Raw data derived from NanoString analysis
Lane 13-24
Detected mRNAs
File Attributes
File name			x	x	x	x	x	x	x	x	x	x	x	x
Sample ID			x	x	x	x	x	x	x	x	x	x	x	x
Owner
Sample Date			x	x	x	x	x	x	x	x	x	x	x	x
File Version			x	x	x	x	x	x	x	x	x	x	x	x
GeneRLF			x	x	x	x	x	x	x	x	x	x	x	x
Comments
Lane Attributes
Lane ID			13	14	15	16	17	18	19	20	21	22	23	24
FOV Count			x	x	x	x	x	x	x	x	x	x	x	x
FOV Counted			x	x	x	x	x	x	x	x	x	x	x	x
Scanner ID			x	x	x	x	x	x	x	x	x	x	x	x
StagePosition			x	x	x	x	x	x	x	x	x	x	x	x
Binding Density			x	x	x	x	x	x	x	x	x	x	x	x
Messages
Reporter Counts
Code Class	Name	Accession
Positive	x	x	x	x	x	x	x	x	x	x	x	x	x	x
Positive	x	x	x	x	x	x	x	x	x	x	x	x	x	x
Positive	x	x	x	x	x	x	x	x	x	x	x	x	x	x
Positive	x	x	x	x	x	x	x	x	x	x	x	x	x	x
Positive	x	x	x	x	x	x	x	x	x	x	x	x	x	x
Positive	x	x	x	x	x	x	x	x	x	x	x	x	x	x
	Sum		x	x	x	x	x	x	x	x	x	x	x	x
	Average
	Lane normalisation factor		1.00762	0.905219	0.857988	0.820416	0.729097	1.22926	1.16962	1.21817	0.98807	1.00873	1.10014	1.34207
Negative	x	x	9.06861	10.8626	12.0118	8.20416	5.83277	14.7512	16.3747	10.9635	10.8688	9.07857	8.80112	5.36829
Negative	x	x	2.01525	6.33653	11.1538	4.92249	6.56187	3.68779	12.8658	26.7997	7.90456	6.05238	6.60084	18.789
Negative	x	x	6.04574	12.6731	12.8698	4.92249	1.45819	51.6291	9.35697	46.2904	14.821	12.1048	15.402	60.3933
Negative	x	x	18.1372	39.8296	40.3254	8.20416	8.02006	120.468	11.6962	163.235	26.6779	17.1484	39.605	152.996
Negative	x	x	13.0991	13.5783	7.72189	4.10208	6.56187	18.439	9.35697	8.52718	12.8449	14.1222	7.70098	13.4207
Negative	x	x	8.06099	4.52609	12.8698	9.02457	10.9364	14.7512	12.8658	21.927	16.7972	14.1222	11.0014	28.1835
Negative	x	x	1.00762	0	0	0.820416	0	3.68779	1.16962	4.87267	0.98807	1.00873	1.10014	5.36829
Negative	x	x	1.00762	0	1.71598	0	1.45819	3.68779	1.16962	6.09084	0.98807	1.00873	2.20028	2.68415
		Mean	7.30527	10.9758	12.3336	5.02505	5.10368	28.8877	9.35697	36.0882	11.4863	9.33075	11.5515	35.9005
		Std Dev	6.13505	12.7966	12.3735	3.38088	3.77846	40.2103	5.52152	53.2141	8.49867	6.14178	12.2224	50.9016
	Mean + 2 Std Dev		19.5754	36.5689	37.0807	11.7868	12.6606	109.308	20.4	142.516	28.4837	21.6143	35.9962	137.704
			5 44 foxl	5 44 six	1 44 foxl	4 48 foxf	4 48 foxc	8b 48 contr	1b 44 contr	8 48 contr	5b 44 contr	1b 48 contr	8 48 myod	5b 48 contr
Endogenous	Dach1	x	3704.02	5669.38	2416.95	2153.59	898.976	18121.8	1698.29	19044.8	3688.46	1794.53	7334.63	13722.7
Endogenous	Delta	x	210.593	148.456	354.349	95.1682	54.6822	1156.74	212.871	1515.4	126.473	232.008	171.622	1305.84
Endogenous	Erg	x	700.298	1284.51	879.437	448.767	195.398	3239.11	538.026	5746.1	794.408	593.133	1295.96	5546.79
Endogenous	Ese	x	228.731	300.533	364.645	188.696	63.4314	2639.23	216.38	3214.75	183.781	271.348	584.174	1398.44
Endogenous	Ets1/2	x	354.684	810.171	449.586	219.871	98.428	3087.91	300.593	4497.48	471.309	389.37	800.902	3423.63
Endogenous	Eya	x	360.729	576.624	527.662	219.051	133.425	1465.28	418.724	2310.86	415.977	390.378	566.572	1958.08
Endogenous	FGFR	x	86.6556	192.812	201.627	69.7353	35.7257	653.969	157.899	752.828	148.21	190.65	166.121	814.638
Endogenous	FOXC	x	283.142	472.524	399.822	153.418	818.775	1311.63	299.423	1846.74	284.564	250.165	381.748	2252
Endogenous	FOXF	x	39.2973	74.2279	176.745	18.0491	24.7893	339.277	80.7039	370.323	46.4393	51.4452	69.3088	315.387
Endogenous	FOXL1	x	259.967	86.901	386.952	100.911	83.8461	1017.83	189.479	1360.69	169.948	294.549	99.0126	1626.59
Endogenous	FOXY	x	563.262	867.2	259.112	397.902	86.7625	1993.87	184.8	2435.12	412.025	117.013	1246.46	2030.56
Endogenous	GATAC	x	139.052	263.419	305.444	114.038	91.8662	1092.82	173.104	1537.33	158.091	204.772	304.739	1229.34
Endogenous	GATAE	x	613.643	974.921	770.473	389.698	215.084	3616.5	625.747	4631.47	668.923	514.452	949.421	4074.53
Endogenous	Gcm	x	1317.97	1740.74	1132.54	540.654	357.986	4260.63	847.976	6468.47	1393.18	767.643	1097.94	6313.11
Endogenous	Gli1	x	1657.54	1892.81	2734.41	877.024	734.929	12950.3	1718.17	15959.2	1661.93	2039.65	2607.33	10566.1
Endogenous	Hh	x	119.907	191.001	266.834	68.0945	51.0368	1073.15	162.577	1321.71	186.745	216.877	185.924	1339.39
Endogenous	mef2	x	381.889	534.984	846.834	241.202	178.629	3465.3	470.188	5697.37	440.679	613.308	634.781	3008.93
Endogenous	Myod	x	143.083	158.413	104.674	125.524	19.6856	693.305	59.6507	680.956	152.163	85.742	278.335	830.743
Endogenous	Myod2	x	4.03049	4.52609	0.857988	3.28166	2.18729	14.7512	0	21.927	1.97614	17.1484	7.70098	21.4732
Endogenous	nanos2	x	181.372	277.902	124.408	67.2741	43.0167	586.359	73.6862	1036.66	155.127	82.7158	191.424	968.977
Endogenous	Not	x	204.548	274.281	112.396	94.3478	40.8294	458.516	49.1241	461.686	103.747	61.5325	189.224	399.938
Endogenous	Notch	x	921.976	1488.18	1720.27	730.99	374.027	6454.87	1070.2	9197.17	984.117	1184.25	1608.4	5670.26
Endogenous	Pax6	x	1622.27	2367.15	2231.63	1014.85	536.615	9396.5	1332.2	12055	1822.99	1339.59	2589.73	8583.9
Endogenous	pitx2	x	41.3126	23.5357	419.556	6.56333	58.3277	211.434	74.8558	320.378	53.3558	213.851	39.605	1136.74
Endogenous	Prox1	x	253.921	530.458	459.881	155.059	103.532	1423.49	264.334	2079.41	301.361	328.846	478.561	1921.85
Endogenous	Ptch1	x	989.486	1664.7	2447.84	642.386	624.107	8872.83	1281.91	11677.4	1193.59	1513.09	1907.64	8763.74
Endogenous	ScratchX	x	344.607	310.49	1093.08	187.875	201.96	2540.89	531.008	2282.85	336.932	632.474	308.039	3975.22
Endogenous	Scl	x	64.4879	113.152	111.538	60.7108	39.3712	377.384	45.6152	510.412	54.3438	67.5849	114.415	402.622
Endogenous	SFRP	x	1037.85	2129.07	943.786	659.614	196.127	12645.4	1453.84	14873.8	1878.32	1344.64	3688.77	12768.5
Endogenous	similar to myocardin	x	701.306	697.924	1066.48	272.378	263.933	4242.19	529.839	5876.44	648.174	713.172	948.32	4147.01
Endogenous	Six1/2	x	103.785	134.878	181.893	65.6333	45.9331	485.56	88.8912	570.103	108.688	123.065	95.7122	638.827
Endogenous	Smo	x	621.704	1072.68	897.455	428.257	254.455	4735.13	623.408	5247.87	925.821	751.504	1171.65	4532.18
Endogenous	SoxC	x	1445.94	1994.2	1951.06	816.314	406.107	8602.4	1264.36	12779.8	1367.49	1286.13	1910.94	9226.75
Endogenous	SoxE	x	77.587	149.361	223.935	32.8166	67.806	534.73	111.114	606.648	72.1291	174.51	113.314	499.251
Endogenous	Tbx6	x	14.1067	11.7678	12.8698	6.56333	1.45819	51.6291	12.8658	97.4534	27.6659	46.4016	6.60084	111.392
Endogenous	tcf21L (myor2)	x	7.05337	15.3887	158.728	12.3062	34.2675	205.287	81.8735	182.725	29.6421	228.982	20.9027	606.617
Endogenous	Tead4	x	1169.85	1528.91	1999.97	647.308	426.522	9237.93	1345.06	13593.5	1280.54	1479.81	2543.52	8429.56
Endogenous	Twist	x	4.03049	6.33653	3.43195	4.10208	5.10368	27.0438	0	37.7632	8.89263	28.2444	11.0014	44.2884
Endogenous	ubq	x	60487.6	84390.8	111238	34601.9	30543.3	369063	54386.2	514951	60808.8	58537.6	102940	415474
Endogenous	VEGFR	x	493.736	1055.49	697.544	388.877	170.609	2785.51	430.421	4080.86	597.782	537.653	964.822	3631.65

## Sheet: lane 25-36
Raw data derived from NanoString analysis
Lane 25-36
Detected mRNAs
File Attributes
File name			x	x	x	x	x	x	x	x	x	x	x	x
Sample ID			x	x	x	x	x	x	x	x	x	x	x	x
Owner
Sample Date			x	x	x	x	x	x	x	x	x	x	x	x
File Version			x	x	x	x	x	x	x	x	x	x	x	x
GeneRLF			x	x	x	x	x	x	x	x	x	x	x	x
Comments
Lane Attributes
Lane ID			25	26	27	28	29	30	31	32	33	34	35	36
FOV Count			x	x	x	x	x	x	x	x	x	x	x	x
FOV Counted			x	x	x	x	x	x	x	x	x	x	x	x
Scanner ID			x	x	x	x	x	x	x	x	x	x	x	x
StagePosition			x	x	x	x	x	x	x	x	x	x	x	x
Binding Density			x	x	x	x	x	x	x	x	x	x	x	x
Messages
Reporter Counts
Code Class	Name	Accession
Positive	x	x	x	x	x	x	x	x	x	x	x	x	x	x
Positive	x	x	x	x	x	x	x	x	x	x	x	x	x	x
Positive	x	x	x	x	x	x	x	x	x	x	x	x	x	x
Positive	x	x	x	x	x	x	x	x	x	x	x	x	x	x
Positive	x	x	x	x	x	x	x	x	x	x	x	x	x	x
Positive	x	x	x	x	x	x	x	x	x	x	x	x	x	x
	Sum		x	x	x	x	x	x	x	x	x	x	x	x
	Average
	Lane normalisation factor		1.06039	1.09008	1.01386	1.18345	0.852019	0.93925	1.07685	1.0073	0.966108	0.936357	1.10997	0.873716
Negative	NEG_A(0)	ERCC_00096.1	15.9059	13.0809	9.12475	13.0179	11.0762	15.028	13.999	14.1022	10.6272	15.9181	13.3197	7.86344
Negative	NEG_B(0)	ERCC_00041.1	15.9059	7.63054	6.08317	10.651	9.37221	3.757	8.61476	11.0803	7.72886	3.74543	6.65984	5.2423
Negative	NEG_C(0)	ERCC_00019.1	19.087	11.9908	15.2079	35.5034	16.1884	15.9672	36.6127	15.1095	18.356	12.1726	26.6393	2.62115
Negative	NEG_D(0)	ERCC_00076.1	38.1741	27.2519	44.6099	107.694	40.0449	30.9952	94.7624	30.2189	29.9493	28.0907	37.7391	9.61088
Negative	NEG_E(0)	ERCC_00098.1	9.54352	13.0809	11.1525	7.10067	11.0762	11.271	16.1527	13.0949	15.4577	11.2363	14.4296	9.61088
Negative	NEG_F(0)	ERCC_00126.1	14.8455	18.5313	15.2079	16.5682	17.8924	17.8457	9.69161	14.1022	14.4916	10.2999	21.0895	10.4846
Negative	NEG_G(0)	ERCC_00144.1	2.12078	1.09008	4.05544	1.18345	1.70404	0	1.07685	1.0073	1.93222	0	3.32992	0
Negative	NEG_H(0)	ERCC_00154.1	2.12078	0	1.01386	3.55034	3.40808	0.93925	3.23054	1.0073	0	0.936357	3.32992	1.74743
		Mean	14.7129	11.5821	13.3069	24.4086	13.8453	11.9754	23.0176	12.4653	12.3179	10.2999	15.8171	5.89758
		Std Dev	11.441	8.93098	13.6179	35.2825	11.9521	10.3835	30.9805	9.1996	9.60224	9.17439	12.1265	4.06469
	Mean + 2 Std Dev		37.5948	29.444	40.5427	94.9736	37.7496	32.7424	84.9786	30.8645	31.5224	28.6487	40.0702	14.027
			8 44 foxy	4b 48 contr	8 44 foxc	8 44 contr	7b 48 contr	8 48 foxf	8 48 foxc	2b 48 contr	8 44 foxf	8 48 foxyl?	8 48 foxyl?	2 48 six
Endogenous	Dach1	dach_742644.1	15162.5	2099.49	10115.3	9442.71	2239.96	3413.23	10260.2	1940.06	5861.37	6156.55	14910.3	1284.36
Endogenous	Delta	NM_001032370.1	194.052	210.385	202.772	633.143	429.417	202.878	293.979	370.686	194.188	161.99	234.204	63.7813
Endogenous	Erg	NM_214668.1	2021.11	597.362	1935.46	3042.64	759.149	835.932	2419.67	797.78	1057.89	753.768	2207.74	310.169
Endogenous	Ese	ese_742603.1	1092.2	256.168	468.404	1029.6	412.377	404.817	729.024	416.014	362.29	432.597	808.06	139.795
Endogenous	Ets1/2	NM_214533.1	1671.18	327.023	1001.69	2178.72	567.445	486.531	1382.67	434.145	502.376	599.269	1600.58	204.45
Endogenous	Eya	GLEAN3_13869.1	453.847	436.031	652.926	1176.34	553.812	414.209	884.09	497.605	353.595	320.234	620.475	177.364
Endogenous	FGFR	GLEAN3_20677.1	256.615	154.791	266.645	444.975	265.83	200.999	296.132	187.357	134.289	131.09	279.713	51.5492
Endogenous	FOXC	DQ286740.1	97.556	309.582	858.74	715.984	398.745	253.597	2138.61	345.503	204.815	127.345	179.816	97.8562
Endogenous	FOXF	DQ286741.1	6.36235	54.5038	31.4297	131.362	94.5741	105.196	129.221	81.5911	31.8816	11.2363	2.21995	11.3583
Endogenous	FOXL1	GLEAN3_15719.1	14.8455	273.609	57.7901	408.289	414.933	145.584	234.752	415.007	41.5426	34.6452	11.0997	27.9589
Endogenous	FOXY	AF517552.1	730.609	109.008	1794.53	2073.4	190.852	595.484	2209.69	158.146	969.972	832.422	1578.38	185.228
Endogenous	GATAC	NM_214539.1	595.94	263.799	398.447	622.492	286.278	248.901	585.804	246.788	186.459	229.408	624.915	69.0236
Endogenous	GATAE	NM_001005725.1	429.458	531.957	989.528	3091.16	781.301	729.797	1698.18	654.743	623.139	466.306	592.725	248.135
Endogenous	Gcm	NM_214661.1	1391.23	742.342	2337.96	3810.69	980.674	896.044	2782.57	964.991	1031.8	785.604	1356.39	408.025
Endogenous	Gli1	GLEAN3_17627.1	2430.42	2090.77	2845.91	6680.55	2594.4	2132.1	4859.8	2085.11	2048.15	1438.25	3420.94	511.998
Endogenous	Hh	NM_001012702.1	65.7442	182.043	162.218	647.345	260.718	244.205	344.59	179.299	136.221	98.3175	113.217	52.423
Endogenous	mef2	XM_790894.2	623.51	502.525	580.942	1758.6	858.835	539.129	987.467	679.926	444.41	374.543	662.654	156.395
Endogenous	Myod	GLEAN3_21119.1	16.9663	66.4947	251.438	1507.71	165.292	166.247	435.045	87.6349	366.155	241.58	129.867	68.1498
Endogenous	Myod2	GLEAN3_06232.1	3.18117	0	5.0693	13.0179	3.40808	1.8785	29.0748	1.0073	5.79665	1.87271	7.76981	1.74743
Endogenous	nanos2	GLEAN3_03591.1	226.924	71.9451	353.837	590.539	90.314	139.948	484.58	94.686	146.848	163.863	299.693	50.6755
Endogenous	Not	NM_214562.1	665.925	78.4855	517.069	474.562	98.8342	122.102	475.966	64.467	271.476	248.135	601.605	82.1293
Endogenous	Notch	GLEAN3_14131.1	2277.72	1027.94	2102.75	4693.54	1732.15	1473.68	2836.41	1314.52	1381.53	1274.38	2463.03	435.984
Endogenous	Pax6	AF016886.1	3256.46	1295.01	3366.02	6667.53	1849.73	1971.49	4528.13	1450.51	2107.08	1672.33	3907.1	586.263
Endogenous	pitx2	XM_777251.1	22.2682	243.087	42.5822	74.5571	450.718	47.9017	83.9939	407.956	14.4916	15.9181	19.9795	18.348
Endogenous	Prox1	XM_776485.1	708.341	306.312	638.732	905.336	399.597	322.163	766.714	344.496	283.07	273.416	872.438	141.542
Endogenous	Ptch1	XM_787086.2	1551.35	1642.75	1676.93	5290	2417.18	1770.49	3091.62	1945.09	1371.87	1185.43	2047.9	400.162
Endogenous	ScratchX	GLEAN3_15640.1	11.6643	973.439	237.243	757.405	1189.42	401.06	654.722	1010.32	200.95	98.3175	71.0382	132.805
Endogenous	Scl	XM_787384.1	209.957	76.3054	121.663	231.955	68.1615	95.8035	215.369	73.5327	54.102	86.1449	254.184	40.1909
Endogenous	SFRP	NM_214507.1	2474.95	929.835	3010.15	6673.45	2526.24	2216.63	4720.89	2179.79	2123.5	1855.86	2873.72	293.569
Endogenous	similar to myocardin	XM_777934.2	899.211	761.964	1093.96	2347.96	1102.51	872.563	1927.55	832.028	672.411	570.242	1207.65	207.944
Endogenous	Six1/2	six12_742614.1	78.4689	136.26	141.941	291.128	143.139	89.2287	242.29	127.927	58.9326	59.9269	71.0382	33.2012
Endogenous	Smo	XM_793986.1	1074.18	614.803	1192.3	2930.21	899.732	977.759	2103.08	800.802	885.921	689.159	1479.59	277.842
Endogenous	SoxC	XM_792991.2	2190.77	1172.92	3141.96	6584.69	2265.52	1775.18	4331.07	1741.62	1924.49	1501.92	3012.47	504.134
Endogenous	SoxE	GLEAN3_16881.1	9.54352	149.341	78.0673	392.904	210.449	117.406	201.37	176.277	50.2376	42.1361	22.1995	36.6961
Endogenous	Tbx6	XM_791917.2	10.6039	15.2611	14.1941	71.0067	43.453	11.271	48.458	28.2043	9.66108	11.2363	2.21995	1.74743
Endogenous	tcf21L (myor2)	GLEAN3_12008.1	16.9663	150.431	11.1525	27.2192	132.063	17.8457	35.5359	219.591	4.83054	9.36357	4.43989	5.2423
Endogenous	Tead4	GLEAN3_21210.1	2642.49	1413.83	2656.32	5414.26	2244.22	1806.18	3903.56	1550.23	1803.72	1642.37	3161.2	371.329
Endogenous	Twist	NM_001105709.1	8.48313	8.72061	8.11089	16.5682	8.52019	10.3317	23.6906	9.06568	3.86443	11.2363	11.0997	0.873716
Endogenous	ubq	GLEAN3_21496.1	96918.7	73546.4	134098	298444	96816.6	81661.2	205810	74746.5	81283.5	61381	109050	18755.2
Endogenous	VEGFR	XM_779931.2	2127.14	440.391	1753.98	2450.92	589.597	670.624	1932.94	482.496	944.853	651.705	2226.6	278.715

## Sheet: lane 37-48
Raw data derived from NanoString analysis
Lane 37-48
Detected mRNAs
File Attributes
File name			x	x	x	x	x	x	x	x	x	x	x	x
Sample ID			x	x	x	x	x	x	x	x	x	x	x	x
Owner
Sample Date			x	x	x	x	x	x	x	x	x	x	x	x
File Version			x	x	x	x	x	x	x	x	x	x	x	x
GeneRLF			x	x	x	x	x	x	x	x	x	x	x	x
Comments
Lane Attributes
Lane ID			13	14	15	16	17	18	19	20	21	22	23	24
FOV Count			x	x	x	x	x	x	x	x	x	x	x	x
FOV Counted			x	x	x	x	x	x	x	x	x	x	x	x
Scanner ID			x	x	x	x	x	x	x	x	x	x	x	x
StagePosition			x	x	x	x	x	x	x	x	x	x	x	x
Binding Density			x	x	x	x	x	x	x	x	x	x	x	x
Messages
Reporter Counts
Code Class	Name	Accession
Positive	x	x	x	x	x	x	x	x	x	x	x	x	x	x
Positive	x	x	x	x	x	x	x	x	x	x	x	x	x	x
Positive	x	x	x	x	x	x	x	x	x	x	x	x	x	x
Positive	x	x	x	x	x	x	x	x	x	x	x	x	x	x
Positive	x	x	x	x	x	x	x	x	x	x	x	x	x	x
Positive	x	x	x	x	x	x	x	x	x	x	x	x	x	x
	Sum		x	x	x	x	x	x	x	x	x	x	x	x
	Average
	Lane normalisation factor		1.06039	1.09008	1.01386	1.18345	0.852019	0.93925	1.07685	1.0073	0.966108	0.936357	1.10997	0.873716
Negative	NEG_A(0)	ERCC_00096.1	6.36235	9.81069	15.2079	8.28412	4.26009	18.785	10.7685	14.1022	8.69497	12.1726	5.54986	6.98973
Negative	NEG_B(0)	ERCC_00041.1	5.30195	6.54046	8.11089	2.36689	6.81615	4.69625	4.30738	4.02919	5.79665	3.74543	3.32992	6.98973
Negative	NEG_C(0)	ERCC_00019.1	8.48313	7.63054	7.09703	3.55034	6.81615	14.0887	7.53792	2.0146	6.76275	10.2999	6.65984	6.11601
Negative	NEG_D(0)	ERCC_00076.1	39.2345	25.0718	39.5406	16.5682	23.8565	22.542	7.53792	8.05838	26.0849	48.6906	32.1892	13.1057
Negative	NEG_E(0)	ERCC_00098.1	8.48313	9.81069	8.11089	20.1186	6.81615	8.45325	9.69161	17.1241	13.5255	6.5545	18.8695	13.9795
Negative	NEG_F(0)	ERCC_00126.1	7.42274	14.171	6.08317	8.28412	9.37221	15.9672	10.7685	14.1022	11.5933	10.2999	13.3197	5.2423
Negative	NEG_G(0)	ERCC_00144.1	1.06039	0	0	0	0	0	0	0	0.966108	0.936357	0	1.74743
Negative	NEG_H(0)	ERCC_00154.1	0	4.36031	2.02772	0	0	2.81775	2.15369	0	1.93222	0.936357	1.10997	0.873716
		Mean	9.54352	9.67443	10.7723	7.39653	7.24216	10.9188	6.59568	7.42882	9.41955	11.7045	10.1285	6.88051
		Std Dev	12.418	7.49445	12.4755	7.5314	7.51103	8.12542	4.04713	6.91486	7.99596	15.5559	10.931	4.70366
	Mean + 2 Std Dev		34.3796	24.6633	35.7232	22.4593	22.2642	27.1696	14.6899	21.2585	25.4115	42.8163	31.9904	16.2878
			1 48 contr	5 48 foxf	5 44 foxf	1 44 foxf	5 48 foxc	5 44 foxc	2 44 foxc	2 48 foxy	1 48 foxy	5 48 foxy	5 44 foxy	2 44 foxy
Endogenous	Dach1	dach_742644.1	4412.95	2101.95	3628.49	1721.42	5108.6	3886.94	2989.09	507.209	2530.83	6666	3338.92	3637.17
Endogenous	Delta	NM_001032370.1	701.842	291.733	353.069	139.305	206.215	121.296	103.875	40.4996	236.391	387.569	114.699	269.977
Endogenous	Erg	NM_214668.1	1612.79	767.525	1161.9	431.485	1311.7	1157.33	926.141	134.999	740.047	1829.39	729.74	941.408
Endogenous	Ese	ese_742603.1	860.477	222.711	346.223	232.477	237.041	178.752	187.364	56.8923	223.847	383.124	206.82	338.224
Endogenous	Ets1/2	NM_214533.1	992.673	435.299	645.5	187.248	768.522	560.879	382.494	76.1778	328.052	764.47	398.286	612.216
Endogenous	Eya	GLEAN3_13869.1	934.988	271.487	515.422	251.473	579.314	452.351	382.494	48.2138	285.598	666.689	329.647	308.115
Endogenous	FGFR	GLEAN3_20677.1	430.239	144.486	252.332	101.313	156.255	126.768	97.0798	26.0355	141.834	330.678	107.474	142.516
Endogenous	FOXC	DQ286740.1	586.47	322.103	653.324	208.054	3090.03	1544.01	1054.29	7.71421	144.729	261.342	115.602	92.3342
Endogenous	FOXF	DQ286741.1	201.9	115.037	185.826	47.0382	105.233	41.9519	19.416	0.964276	3.85944	16.0005	6.322	9.0327
Endogenous	FOXL1	GLEAN3_15719.1	598.488	302.777	390.234	85.9352	276.37	82.0799	53.3939	19.2855	142.799	372.457	37.932	85.3088
Endogenous	FOXY	AF517552.1	245.164	138.964	467.499	288.561	972.611	985.87	929.054	9.64276	190.077	120.893	90.3143	108.392
Endogenous	GATAC	NM_214539.1	391.781	242.037	335.464	90.4581	336.959	220.704	125.233	21.2141	154.378	342.234	121.924	155.563
Endogenous	GATAE	NM_001005725.1	1591.16	601.872	1073.88	419.725	1144.81	805.295	609.661	77.1421	504.621	1071.15	372.998	537.947
Endogenous	Gcm	NM_214661.1	2172.82	904.649	1773.17	672.103	2252.42	1747.39	1471.73	187.07	851.006	2144.07	939.269	1197.33
Endogenous	Gli1	GLEAN3_17627.1	4235.09	1765.12	2646.55	956.142	2605.32	1813.97	1187.29	263.247	1675	3223.22	1025.07	1573.7
Endogenous	Hh	NM_001012702.1	576.856	196.023	295.365	104.931	272.118	127.68	88.3426	29.8926	194.902	535.129	158.05	149.541
Endogenous	mef2	XM_790894.2	1785.85	713.228	801.007	254.187	698.366	407.663	273.765	78.1064	413.925	1034.7	354.032	489.773
Endogenous	Myod	GLEAN3_21119.1	165.846	76.3844	225.925	85.0306	164.759	140.448	174.744	26.0355	102.275	332.456	91.2174	214.777
Endogenous	Myod2	GLEAN3_06232.1	14.4214	1.84059	0.978031	2.71374	3.18889	0.911999	1.9416	1.92855	3.85944	0.888919	1.80629	2.00727
Endogenous	nanos2	GLEAN3_03591.1	161.039	78.225	177.024	55.1794	281.685	215.232	126.204	4.82138	54.997	113.782	55.0917	61.2216
Endogenous	Not	NM_214562.1	112.968	70.8626	190.716	60.6069	146.689	166.896	125.233	17.357	92.6265	190.229	115.602	135.49
Endogenous	Notch	GLEAN3_14131.1	3477.96	1121.84	1673.41	811.409	1405.24	923.855	697.033	157.177	1169.41	2293.41	759.543	1125.07
Endogenous	Pax6	AF016886.1	4497.07	1619.72	2608.41	1156.05	2445.88	1875.98	1246.5	194.784	1605.53	3106.77	1221.05	1591.76
Endogenous	pitx2	XM_777251.1	598.488	489.596	360.893	8.14123	211.529	76.6079	11.6496	12.5356	13.508	82.6694	6.322	15.0545
Endogenous	Prox1	XM_776485.1	894.127	348.791	489.015	156.492	452.822	336.527	247.553	50.1424	280.774	744.914	268.233	292.057
Endogenous	Ptch1	XM_787086.2	3747.16	1700.7	2310.11	701.05	2186.51	959.422	730.04	232.391	1272.65	3481.89	837.214	1202.35
Endogenous	ScratchX	GLEAN3_15640.1	1769.03	812.619	930.107	246.951	644.155	256.272	237.845	13.4999	61.751	96.0032	27.0943	74.2688
Endogenous	Scl	XM_787384.1	194.689	69.022	88.0228	37.9924	106.296	69.3119	65.0435	19.2855	78.1536	136.893	65.0263	93.3379
Endogenous	SFRP	NM_214507.1	2816.98	1410.81	2399.11	750.802	2408.67	1406.3	972.74	161.034	797.939	3251.66	1168.67	1162.21
Endogenous	similar to myocardin	XM_777934.2	1321.96	788.692	1047.47	303.035	1060.84	636.575	403.852	73.285	530.673	1419.6	388.352	558.02
Endogenous	Six1/2	six12_742614.1	305.253	111.356	200.496	59.7023	226.411	152.304	97.0798	15.4284	54.997	160.894	56.898	81.2943
Endogenous	Smo	XM_793986.1	1922.85	825.504	1295.89	479.428	1179.89	815.327	517.435	90.642	690.839	1552.94	595.171	676.449
Endogenous	SoxC	XM_792991.2	3110.22	1537.81	2141.89	929.909	2410.8	1705.44	1427.07	224.676	1250.46	3009.88	1141.57	1584.74
Endogenous	SoxE	GLEAN3_16881.1	480.713	102.153	126.166	73.271	166.885	126.768	79.6054	10.607	68.505	207.118	48.7697	70.2543
Endogenous	Tbx6	XM_791917.2	76.9142	27.6088	26.4068	6.33206	9.56666	8.20799	4.85399	2.89283	4.8243	16.0005	11.7409	13.0472
Endogenous	tcf21L (myor2)	GLEAN3_12008.1	382.167	147.247	123.232	30.7557	97.7925	23.712	16.5036	7.71421	42.4538	80.8916	9.03143	31.1126
Endogenous	Tead4	GLEAN3_21210.1	2941.97	1408.97	2028.44	711	1790.03	1139.09	704.799	181.284	1120.2	2713.87	957.332	1145.15
Endogenous	Twist	NM_001105709.1	14.4214	6.44206	6.84621	2.71374	4.25185	5.47199	0.970798	2.89283	0	1.77784	7.22514	1.00363
Endogenous	ubq	GLEAN3_21496.1	163467	71425.8	101567	36893.3	117112	74196.6	43928.6	10863.5	68222.3	196837	71089.1	77431.3
Endogenous	VEGFR	XM_779931.2	1283.5	558.618	880.228	360.023	1245.79	1110.81	706.741	108.963	513.305	1366.27	681.873	866.135
