# Supplementary material for: Logics and properties of a genetic regulatory program that drives embryonic muscle development in an echinoderm
Source: eLife. 2015 Jul 28;4:e07343. doi: 10.7554/eLife.07343 (PMC4549668; doi:10.7554/eLife.07343)
Supplement: Figure 7—source data 1. — DOI: http://dx.doi.org/10.7554/eLife.07343.023 [file elife07343s003.xlsx]

## Sheet: all notes
Evidence for all inputs reported in Figure 7
28 -32 h
note n.	TF/PATHWAY	TARGET	EVIDENCE
1	FGFR1 mediated pathway	FoxC	WMISH after SU5402 treatment, FGFR1 MO and DnRNA injection. * FGFA ligand was not tested separately for his involvelment in the downstream signalling event.
		FoxF	WMISH after SU5402 treatment and FGFR1 MO injection
2	FoxY	Nanos	WMISH after FoxY MO injection
		FoxC	WMISH after FoxY MO injection
		FoxY	WMISH after FoxY MO injection
3	Notch/Delta	FoxY	demonstrated by Sherwood and McClay 1999; confirmed by Materna and Davidson 2012, Materna et al 2013, confirmed by WMISH
4	NSMR	FoxY	postulated by Materna and Davidson 2012
40 -44 h
note n.	TF/PATHWAY	TARGET	EVIDENCE
5	FoxY	Nanos	Nanostring and qPCR after FoxY MO injection
		FoxY	Nanostring and qPCR after FoxY MO injection, confirmed by Materna et al 2013
		FoxC	Nanostring and qPCR after FoxY MO injection, confirmed by Materna et al 2013
		FoxF	Nanostring and qPCR after FoxY MO injection, confirmed by Materna et al 2013
		FoxL1	Nanostring after FoxY MO injection
		Pitx2	Nanostring after FoxY MO injection, confirmed by Materna et al 2013
		ScratchX	Nanostring after FoxY MO injection, confirmed by Materna et al 2013
		SoxE	Nanostring after FoxY MO injection, confirmed by Materna et al 2013
		GataE	Nanostring after FoxY MO injection, confirmed by Materna et al 2013
		MyoR	Nanostring after FoxY MO injection
		Six1/2	Nanostring after FoxY MO injection, confirmed by Materna et al 2013
6	FoxC	FoxC	Nanostring and WMISH (not shown) after FoxC MO injection
		Not	Nanostring after FoxY MO injection
		Dachshund	Nanostring after FoxY MO injection
		FoxF	Nanostring and qPCR after FoxC MO injection
		Tbx6	Nanostring after FoxC MO injection
		FoxL1	Nanostring after FoxC MO injection
7	FoxF	FoxY	qPCR after FoxF MO injection
8	Six1/2	FoxL1	Nanostring after Six1/2 MO injection
		Pitx2	Nanostring after Six1/2 MO injection
		MyoR	Nanostring after Six1/2 MO injection
45 -48 h
note n.	TF/PATHWAY	TARGET	EVIDENCE
9	FoxY	FoxY	Nanostring after FoxY MO injection
		Nanos	Nanostring after FoxY MO injection
		FoxF	Nanostring after FoxY MO injection
		FoxL1	Nanostring after FoxY MO injection
		FoxC	Nanostring after FoxY MO injection, confirmed by Materna et al 2013
		ScratchX	Nanostring after FoxY MO injection, confirmed by Materna et al 2013
		SoxE	Nanostring after FoxY MO injection, confirmed by Materna et al 2013
		MyoR	Nanostring after FoxY MO injection
		Pitx2	Nanostring after FoxY MO injection, confirmed by Materna et al 2013
10	FoxC	FoxC	Nanostring after FoxC MO injection
		FoxF	qPCR and WMISH after FoxC MO injection
		Tbx6	Nanostring after FoxC MO injection
11	FoxF	FoxY	Nanostring, qPCR and WMISH after FoxF MO injection
12	FoxL1	FoxF	Nanostring after FoxL1 MO injection
		FoxY	Nanostring after FoxL1 MO injection
		Not	Nanostring after FoxL1 MO injection
		Pitx2	Nanostring after FoxL1 MO injection
		MyoR	Nanostring after FoxL1 MO injection
		Dachshund	Nanostring after FoxL1 MO injection
13	Six1/2	MyoR	Nanostring after Six1/2 MO injection
14	Tbx6	Pitx2	Nanostring after Tbx6 MO injection
		FoxY	Nanostring after Tbx6 MO injection
		Scl	Nanostring after Tbx6 MO injection
		Dachshund	Nanostring after Tbx6 MO injection
		MyoR	Nanostring after Tbx6 MO injection
References
Materna SC, Swartz SZ, Smith J. Notch and Nodal control forkhead factor expression in the specification of multipotent progenitors in sea urchin. Development. 2013;140(8):1796-806.
Materna SC, Davidson EH. A comprehensive analysis of Delta signaling in pre-gastrular sea urchin embryos. Developmental biology. 2012;364(1):77-87.
