# Supplementary material for: Logics and properties of a genetic regulatory program that drives embryonic muscle development in an echinoderm
Source: eLife journal article supplement (doi:10.7554/elife.07343), 2015-07-28

A

TTACTGAATTTTGGACGAGGATCTTCATATAGCCTCGTTTACCAGTGTCTTGTAAGAAATCAAGCC  
CAGAGGAGAGGTTGAACAAAGGAGTTAGGGCAAGATTGTGCCGGTGGTAAGCAAGGAAGTGAAGG  
CTAGCTCTAGTCCCCACCCCGTACCGTGTGCGGTTACATTGATTGACGTGGTTCCCATAGAGAGTA  
AATCCTGGTCTGCCCTTATCACGGGCCAGCGACCGCGCCGCGGGATTTCGACCAATCA**CGGAGAGCG**  
**ACAGTAAAAGG**CAC**GGTATGTGCCTCGCACTGTCAGTCA**CTGGATAGTCAGAAGCACTTGAAACAC  
CGTCAAAACAAGGGCTCGTCGTGTGCGCGCAACCTCCTCACTATAACACGCGCATTGTTCAAGCAA  
GCCAAAGAGTCGCATCATCCTCTTCAGCCGCCACTGTCTTGCCTTCATCTTCATCCAGAGCAGGAC  
TC**ATCATCCTATCCTTGCCACG**GACCTGGGCCCCGGTAAAGCCACCGGTCTCCTCATCCATCTCTTC  
GCCACC**ATG**CTCCCGTCCTTTGGTTTTACTCAAGAGCAGGTTGCCTGCGTCTGCGAGGTTCTCCAA  
CAATCCGGCAACATCGAGAGACTTGGCCGTTTTCTCTGGTCTGCTACCTGCCTGTGAGCATCTCCAC  
AAGAATGAAAAGTGTCTCAAAGCCAAGGCGATTGTTGCCTTCCATCGCGGAAATTTTCGGGAACTT  
TACAAAATTCTCGAGAGCAATAACTTCTCACCGCATAACCACCCAAAACCTTCAGGCTCTCTGGTTG  
AAAGCACACTACATCGAAGCGGAGAAATTGCGGGGACGGCCCCTGGGTGCCGTGCGGAAAATACAGG  
GTCCGAAGAAAGTTTCTCTGCCTCGTACTATCTGGGATGGAGAG**GAGACTAGCTATTGCTTCAAG**  
**GAGAAATCGAGA**AGTATACTAAGAGAATGGTACTCCCAACAACCCCTATCCTTCTCCAGGGAGAAA  
**AGAGAGCTGGCCGAAGC****CACAGGACTGACCACGACACA**AGTTAGCAACTGGTTCAAAAATAGGCGA  
CAGCGAGATCGAGCAGCGGAGGCAAAAGAAAG

B

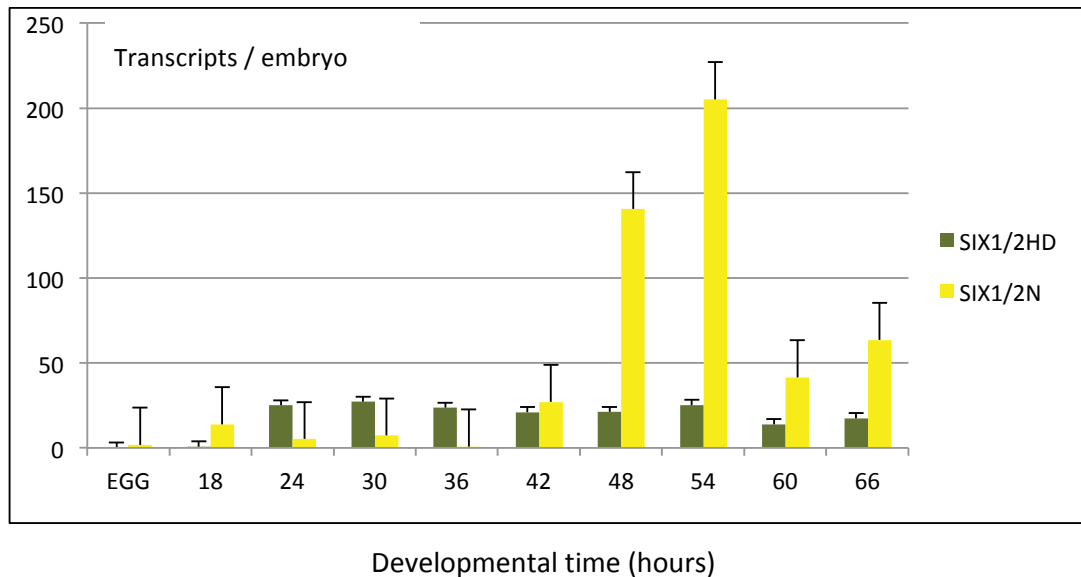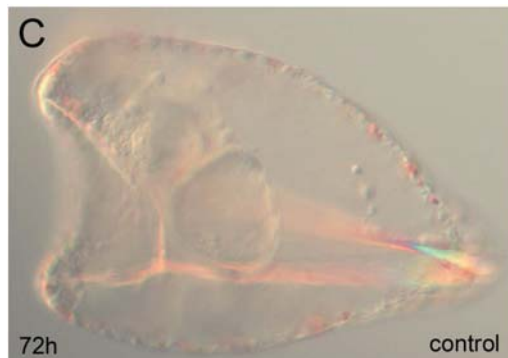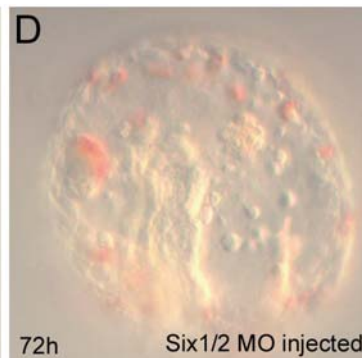

Supplement: supp [file elife-07343-supp-v1.zip]
