# Supplementary material for: Logics and properties of a genetic regulatory program that drives embryonic muscle development in an echinoderm
Source: eLife. 2015 Jul 28;4:e07343. doi: 10.7554/eLife.07343 (PMC4549668; doi:10.7554/eLife.07343)
Supplement: Supplementary file 1. — Primers, MOs, and nanoprobe sequences. DOI: http://dx.doi.org/10.7554/eLife.07343.025 [file elife07343s004.xlsx]

## Sheet: Sheet1
Acc. Numbers	Gene name	Primer F	Primer R	Use	morpholino antisense oligunocleotide (MO) sequence	Nanoprobe
SPU_018581	Dach1					GCGGACTACACACGGTTTACACAAAACTGAAGAGACTGAGCATCACTCCGGTGGTTTGTAACGTAGAACAGGTTCGCATCCTGCGGGGACTTGGGGCGAT
NM_001032370.1	Delta					GAAAATGGAGGAACCTGTCTGCAAGATGTAATGGGAGGATTCATGTGCGAGTGTGCTGAAGGATGGATAGGTACAACATGTACGCAATCGACTGGTAAAG
NM_214668.1	Erg					TGTATAGGAAGCATTATCGGTAGTCTCGGACGACCAGACGCTATTTGAGAACACATACCGTGAGGTGAATAAGTCCAACACTATCGTCTCGTCGCCACAC
SPU_024903	Ese					TCCGGGACCTTCTCAAGTCCGAATCCTACTGCCCGAAGTTTATCCGATGGGAGGATCGGGAAGCCGGAGTTTTCCGATTCGTCAACTCGGAAGCGGTCGC
NM_214533.1	Ets1/2					GCTCATCGCCACACGTACAGAAGCCGAGTAATTCCTGGTCGACGATTCGAGTTCGACCTCCAACAAGAGCCGCGCTGAGCATCAATCATGGCGTCTATGC
SPU_013869	Eya					TTGGGATTTGGATGAAACCATAATCATCTTCCACTCACTGTTAACGGGGTCATATGCAACCAGGTTTGGAAAGGATGCTCCAGCAGCTGTATCATTAGGT
HQ107979	FGFA	ACGGTATTAGTTCAGGACAGGGC	AACGGCAAGGCGAAAGTTGG	WMISH
SPU_020677	FGFR1	GCGGCTTAGGTTCTCTGATG	ATGTCTGGTTTGTCCGAAGG	WMISH	MO: TCCTCGGACAACGCGGCAGACTCAT	TGAGATGGTTTCCGCATCACTATTTGATCTTCCACCTCCACCTCCTCCTCCTTTCATCTTGTATGAGATATGCATGAGATACTGTGCCTGCCTGCCTGAC
SPU_024139	FoxC	GAAAATCACCCTCAACGGAAT	CCCCTTGCCTGGTTTCTTAT	qPCR	MO: GTACATTGGCATGGAGGTTTATCTC; MO2: ACTGAGGCTGATTCAGGATTCCGAC	ATCAAGGAATGGCGATGCAACCTTATCATTCAGCGGCTCCTTCCATACCTGGCGTCATGCATTCGGTGTTTCCACCAGAACAGGGCTACTATCGGCACCC
SPU_000975	FoxF	CGTAATGGCGATCCAGAGTT	TGAGAGGTTGTGACGAACAGA	qPCR	MO: GACATACTCTCTAGTTGAGTCATCT; MO2: GAAAGTAGCAAATGACTCCAGCGGC	TATGATCGGTGGCCCGATGTCGCCACACCTTGCGAACAGCGCACCGAACGCCTGCTCGCCCAACGGTGGATTCATGACTAGCTGCTCGATGGCGGGTGGG
SPU_015719	FoxL1				MO: CGCTCAGTGATGCCATCCTGATTTC; MO2: CGCTCAGTGATGCCATCCTGATTTC	GCCATTCGAAACTCATCCGACAAGAAAGTCACTCTGAACGGCATCTATCAGTTTATCATGGATCGATTCCCTTATTACCATGACAACAAGCAAGGCTGGC
SPU_010403	FoxY	TGCACTGCACTGACTCTGC	CTTTCCATTCCGTGGTGAAG	qPCR	MO: CATGGCTCCAAGTGCAGAACACTAC	GCCTACCTACCCAGCTTCACAAATCTCGCCTCATCGATTGCCTTACTCCTCATTTTCCATACCATTTGTAGTGTTCTGCACTTGGAGCCATGGAAGCGCA
NM_214539.1	GataC					TGGGCGCTCTGGCGTAGAGAACCCGAAACTATTTCGGACTAACTTATAGAACTACTGCGAGCTGGACTCTGGGACAGATAAATGCTTTCATTGTGATTGA
NM_001005725.1	GataE					ACCTCTCATCAAAAACCCAAGGAGATTGCAGTCTGGCTCAAGACGAGAAGGAATTACATGTGCTAACTGTCACACTAGCACTACAACACTGTGGCGTAGG
NM_214661.1	Gcm					GTTCGGGAGAAATCGTGACTGTTCGGCCAGCCACTTCGGATCGTGCTCGGAAGAAGCAAGGCGATAAGAAATGCCCAAGGACCGGTTGCGATGGCAAACT
SPU_017627	Gli1					GCTTACTCTCGACTTGAGAACCTCAAGACTCATCTTCGATCCCATACCGGTGAGAGACCGTATGTCTGTGAGTTCCAGGGATGTACCAAAGCCTTCTCTA
NM_001012702.1	Hh					CAACTTATCAGGGTCGCTCAAACGGTGGTTATCGATGAGGCTCGCGGTAGGGAGGGGGAATGTAAATCCACGAGGTATCGGAAGTTGAGCAAGTGGATCA
SPU_016168	Mef2					TGAGTCCTACATCCTAACGCCACGCACTGAAGCCAAATACCAGAAGATCAATGAGGAATTTGACAGAATGATGAATGGTGGAAGTGGGCAACCCATGAGC
SPU_006232	Myod2				MO: GTATGGGTACATTGTCTCTTCGCGT	CTGCCGAGGCCGAAACGACCAGGACGCTGAACGCAACGACGCCATGATCATCGGCACGAACAACGCTTCCATGACGGGATCGCTCGACAACGGCTATAGC
SPU_003591	Nanos2	AGTTGGAAGAACGGAGCTGA	TCATACATCGGGGGAAACAT	qPCR		CTATCAGTGACATGAACAACAATATGGTCTCTGGTCTGCCCGTCTCGACGAGCCAGTCATCGACTACTGCTTCGACCGGATTCATGCCGTTACAGTTGCC
NM_214562.1	Not					CCGTCGTGACACGGACCGAACATCGCCGTCCTCGTCGAATGACTCTTCGTCCTCCACCGCCAACTTCTCGGCCGCGTTGCAGTTGGAGGTGAAGAAGGTC
SPU_014131	Notch					CTGCGAGTCTGTCGTTAACTGGTGCAGCCCTCAGAACAACCCTTGCTACAATGGAGCTAACTGCGTTGCAATGGGTCACCTGTATGAGTGTCGCTGTACA
SPU_006786	Pax6					GACTCGTGATTCCTTTATCCGAGTCGGCAGGGTTGCACACATTGACACCTGTGCAGAGTGATACGAACGTAAGGGGCGCTTATACGCGAGTGGTTGAAAG
SPU_004599	Pitx2					GGTGTGAAGGGTGGTCACGACGATGGCGACGATTCGGACAACGACCAGGACAACGGCAAGAAGAAGCGTACTCGTCGACAACGCACACATTTCACCAGCC
SPU_015984	Prox1					TTTGTGCAGCGATACAGAATCACAAGATTCATTTGCGCAGGACAGAGTGGCGGAGGATCGCAGCAGTTTGCTTTATTCGGAAGAAGATATTGCGGAGAGC
SPU_003313	Ptch1					AACTCAGGACATCAATGCTCTCTCATCTGCATCTCTGGAAGATCTCCTCCAAGACTTCTCACGGACAAGTGTTGTTCGGGTTGCCATGGGTTACGCTATC
SPU_15640	SchratchX					CATGTGGGACTGCTTTGCAGCAGAAACAGCCATCCAGAGTTACTATGGTTACTCCAGCGTTATTCAAATTCCATCGGCGAGGTCTGTTGTCTCAGTGCCC
SPU_028093	Scl					ACCGGTGCTGGAGCGGGTAGGCTCGGGTAAAGTCGTACGCCGAATCTTCACCAATAGCCGAGAGCGATGGCGGCAGCAGAATGTTAACTCTGCATTTTCC
NM_214507.1	SFRP1					TACCACCACCGTTCATTCATTAGTTTGGAGCCCTTATCGAAGAGAACACCTGTCACAGCGCTACTGCGATGGAGTTTCCACCTCAAATAGTATTACCCTG
LOC577722	Similar to myocardin					CCATGAGTACAAGCCTCCTAATGAACAGGCAAACAAACTTGAAATTCCACCAAATGCCAGTAATCCGTATAACTTGCTGTTGATGCAGCAACAACTGCTT
SPU_017379	Six1/2N				MO: TGACTGACAGTGCGAGGCACATACC; MO2: TGCCTTTTACTGTCGCTCTCCGTGA	GGTTGCCTGCGTCTGCGAGGTTCTCCAACAATCCGGCAACATCGAGAGACTTGGCCGTTTTCTCTGGTCGCTACCTGCCTGTGAGCATCTCCACAAGAAT
SPU_006789	Smo					GAACTGGAAAGAGGATGGCCACATTTCTTGCAGTGCAACGAAGAGCACATGCCTAGAGATTGCAGTGAACCAAACACCTACAAGGCAGTGACATTTAACT
SPU_002603	SoxC					GCTGCTAAGACCACCAGCAGCAAACCAAAAGCCAACAAGCCCAAGTCATCATCGAAATTGACGAAGATGAATGGCATCGTGATCGACCAGATGCACCCGC
SPU_016881	SoxE					GCTGGTGTCGATGTCCGTGACTTTGGTGGCGACATCATGGGCATGGAGGAGTTTTCATCGGAGGAGCTGGACCAGTACATCGTGCAGACCATAGCTAGTG
SPU_020346	Tbx6				MO: GTATTCCTCGCTACCGTCATACATC; MO2: TTCCCACTTGTCACCACCACCGAGA	ACGGTTGCGATGCGAGGTTGTCTGATTATAACACGGGAAATGGAATGGTCGATACGTTATCGCCCTGTTACACGCAGGACGGTGTCATGGATGACAACGG
SPU_012008	Tcf21L (MyoR2)					CTCGGATGCGAGTGTTAAGCAAAGCCTTCTCCAAGCTGAAGACGAGTCTGCCGTGGGTTCCGCCAGATACGAAGCTCTCTAAACTAGATACACTTCGACT
SPU_021210	Tead4					TGAGATCTCGCGGTCGCCCATGTGTGAATACATGATCAACTTCATCCACAAACTCAAGCATCTCCCAGAGAAGTACATGATGAACAGTGTTCTAGAGAAC
SPU_030059	Twist					CACAAAATCAGGCGAAAGGGACCGCAATCGTTCGACGAACTCCAGAATCAACGCGTCCTTGCCAATGTGCGAGAACGACAACGTACTCAATCACTAAACG
SPU_021496	Ubq					TTGTCAAGACCCTCACCGGCAAGACCATCACACTCGAGGTCGAGCCAAGTGACTCCATCGAGAACGTAAAGGCCAAGATCCAGGACAAAGAAGGCATCCC
XM_779931.2	VEGFR					TTCAATGTTACCTGCAATGTAGAATCACCCCTTGGAATCCAAATCAGGTGGAAATGGGACTATCCAGGTCTTCATAACCCCAACGCTAATCCCAATAATT
		\
