# Supplementary figures and images for: Logics and properties of a genetic regulatory program that drives embryonic muscle development in an echinoderm
Source: eLife journal article supplement (doi:10.7554/elife.07343), 2015-07-28

Figure 4 - figure supplement 4

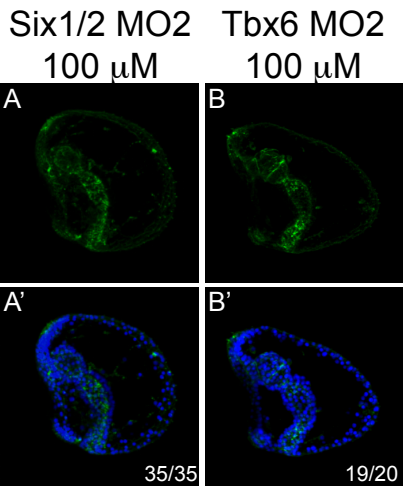

Supplement: supp [file elife-07343-supp-v1.zip]

A

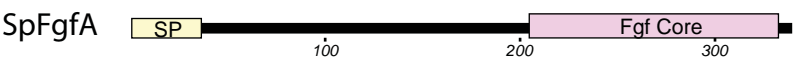

B

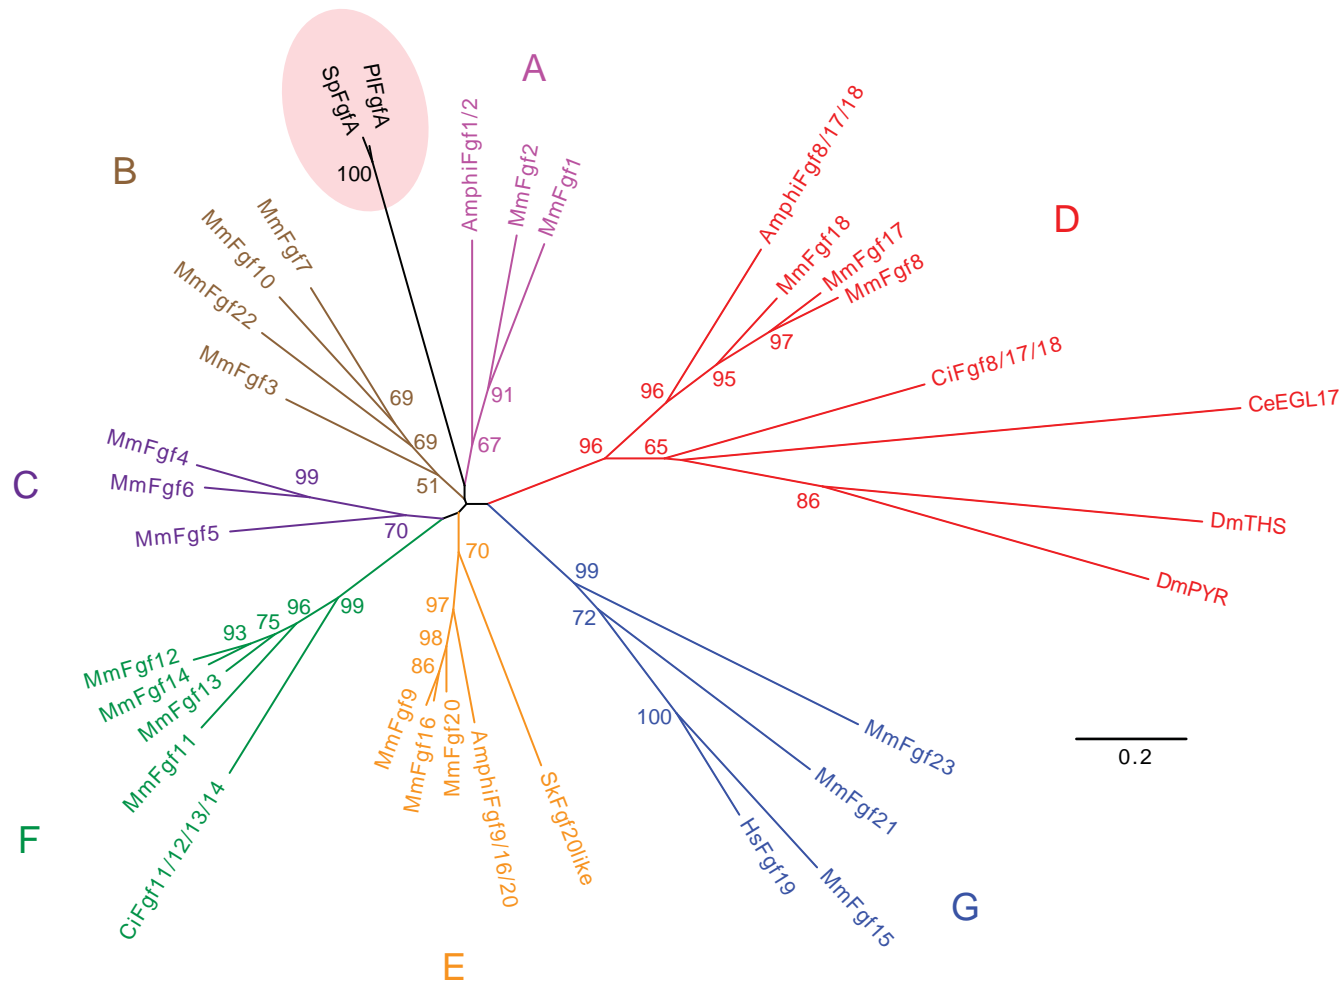

Supplement: supp [file elife-07343-supp-v1.zip]

A

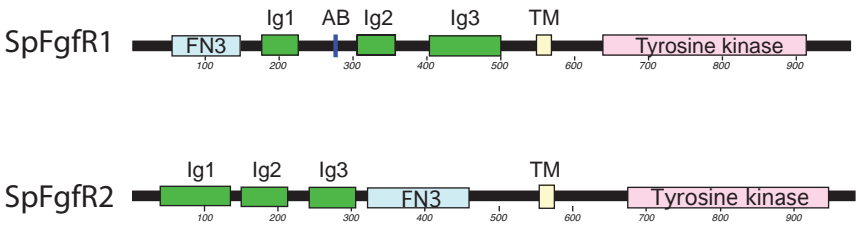

B

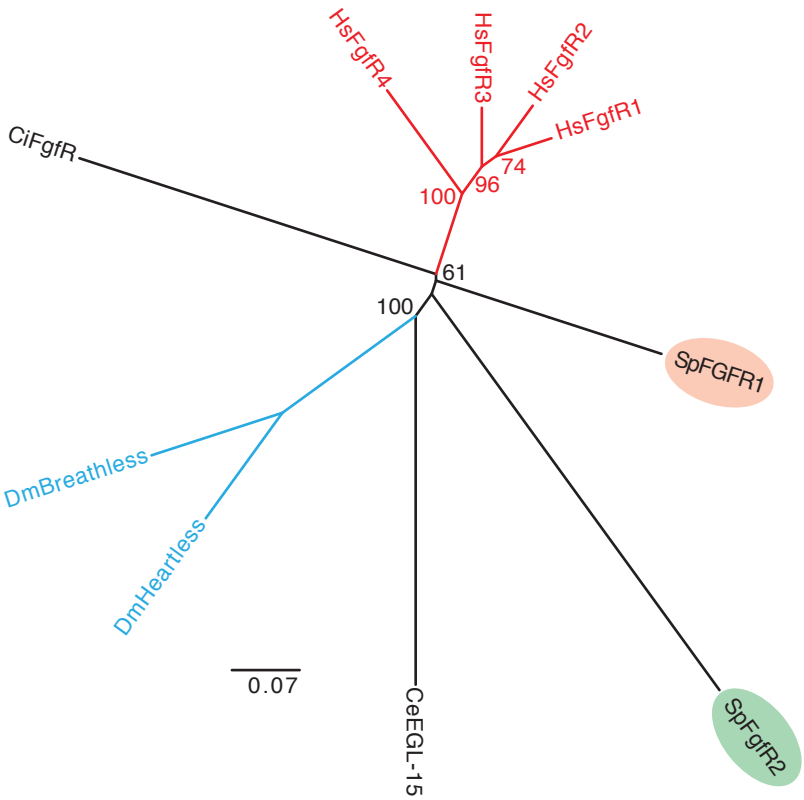

Supplement: supp [file elife-07343-supp-v1.zip]

Figure 4 - figure supplement 1

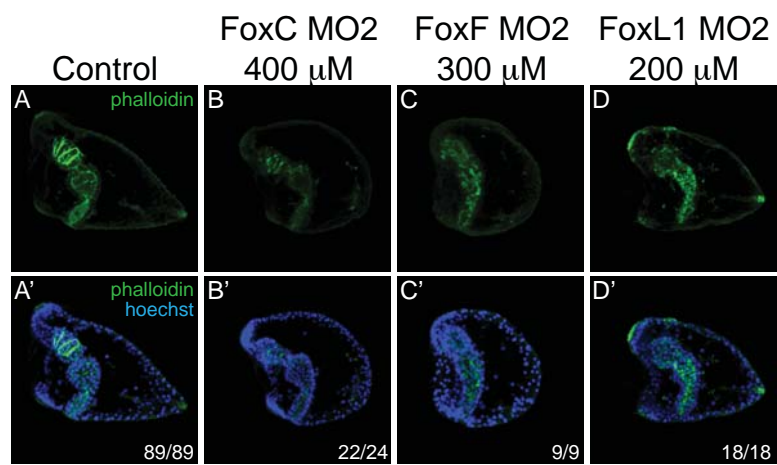

Supplement: supp [file elife-07343-supp-v1.zip]
